# Supplementary material
Source: PubMed Central journal article supplement (PMC5566534)
Supplement: 10.1074_M117.798488_jbc.M117.798488-1.pdf [file 10.1074_M117.798488_jbc.M117.798488-1.pdf]

## Supplementary Table.

**Table S1.** Yeast strains used in this study.

| Strain       | Relevant Genotype           | Genotype                                                                                               | Reference/Source |
|--------------|-----------------------------|--------------------------------------------------------------------------------------------------------|------------------|
| JW81         | WT                          | <i>h- ade6-M210 leu1-32 ura4-D18</i>                                                                   | (1)              |
| <i>idn1Δ</i> | <i>idn1Δ</i>                | <i>h+ ade6-M210 leu1-32 ura4-D18 SPAC4G9.12Δ::kanMX4</i>                                               | Bioneer          |
| <i>gcd1Δ</i> | <i>gcd1Δ</i>                | <i>h+ ade6-M210 leu1-32 ura4-D18 SPCC794.01cΔ::kanMX4</i>                                              | Bioneer          |
| ABY540       | <i>loz1Δ</i>                | <i>h+ ade6-M210 leu1-32 ura4-D18 SPAC25B8.19cΔ::kanMX6</i>                                             | (2)              |
| ABY84        | <i>loz1-1</i>               | <i>h+ ade6-M210 leu1-32 ura4-D18 loz1-1</i>                                                            | (2)              |
| ABY880       | <i>idn1Δ loz1Δ</i>          | <i>h- ade6-M216 leu1-32 ura4-D18 SPAC25B8.19cΔ::kanMX6 SPAC4G9.12Δ::kanMX4</i>                         | This study       |
| ABY1098      | <i>idn1Δ idn1-GFP</i>       | <i>h+ ade6-M210 leu1-32 ura4-D18 SPAC4G9.12Δ::kanMX4 JK148-pgk1-idn1GFP::LEU2+</i>                     | This study       |
| ABY1050      | <i>idn1Δ JK148</i>          | <i>h+ ade6-M210 leu1-32 ura4-D18 SPAC4G9.12Δ::kanMX4 JK148::LEU2+</i>                                  | This study       |
| ABY1067      | <i>idn1Δ loz1Δ idn1-GFP</i> | <i>h? ade6-M? leu1-32 ura4-D18 SPAC25B8.19cΔ::kanMX6 SPAC4G9.12Δ::kanMX4 JK148-pgk1-idn1GFP::LEU2+</i> | This study       |
| ABY991       | <i>gcd1Δ loz1Δ</i>          | <i>h? ade6-M? leu1-32 ura4-D18 SPAC25B8.19cΔ::kanMX6 SPCC794.01cΔ::kanMX4</i>                          | This study       |
| ABY1115      | JW81 <i>gcd1-lacZ</i>       | <i>h- ade6-M210 leu1-32 ura4-D18 JK148 gcd1-lacZ::LEU2+</i>                                            | This study       |
| ABY1095      | <i>loz1Δ gcd1-lacZ</i>      | <i>h- ade6-M216 leu1-32 ura4-D18 SPAC25B8.19cΔ::kanMX6 JK148-gcd1-lacZ::LEU2+</i>                      | This study       |
| ABY1116      | <i>Gcd1-13myc</i>           | <i>h- ade6-M210 leu1-32 ura4-D18 SPCC794.01c-13xmyc::kanMX6</i>                                        | This study       |
| ABY1100      | <i>idn1Δ gcd1Δ</i>          | <i>h? ade6-M? leu1-32 ura4-D18 SPAC4G9.12Δ::kanMX4 SPCC794.01cΔ::kanMX4</i>                            | This study       |
| ABY1395      | <i>zwf1Δ</i>                | <i>h+ ade6-M? leu1-32 ura4-D18 SPAC3A12.18Δ::kanMX6</i>                                                | This study       |
| ABY1382      | <i>zwf1Δ gcd1Δ</i>          | <i>h? ade6-M? leu1-32 ura4-D18 SPAC3A12.18Δ::kanMX6 SPCC794.01cΔ::kanMX4</i>                           |                  |

## References

1. Wu, J. Q., Kuhn, J. R., Kovar, D. R., and Pollard, T. D. (2003) Spatial and temporal pathway for assembly and constriction of the contractile ring in fission yeast cytokinesis. *Dev Cell* **5**, 723-734
2. Corkins, M. E., May, M., Ehrensberger, K. M., Hu, Y. M., Liu, Y. H., Bloor, S. D., Jenkins, B., Runge, K. W., and Bird, A. J. (2013) Zinc finger protein Loz1 is required for zinc-responsive regulation of gene expression in fission yeast. *Proc Natl Acad Sci U S A* **110**, 15371-15376

Supplemental Figures.

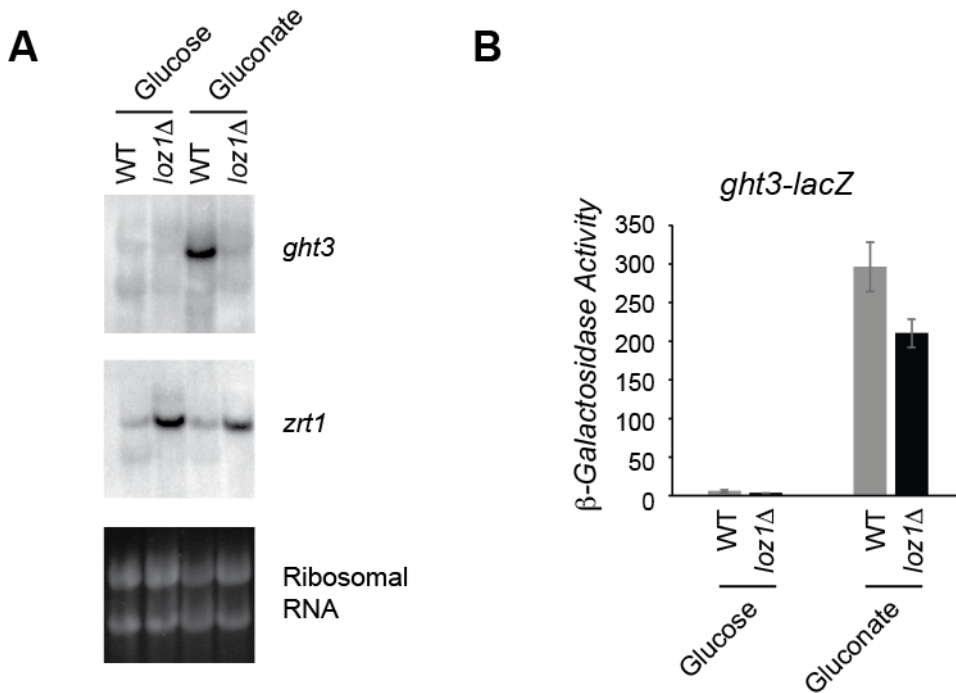

**Figure S1.** *ght3* is not expressed at high levels in cells grown using glucose as the carbon source.

A. Wild-type and *loz1Δ* cells pregrown in YES medium were inoculated to an  $OD_{600}$  of  $\sim 0.1$  in fresh YES medium. Cells were grown for 1 hr in YES medium containing 3% glucose as the carbon source. Cells were then spun down, washed, and were transferred to YES medium containing 3% glucose or 4% gluconate. After 4 hrs growth, cells were spun down and total RNA extracted for RNA blot analysis. RNA blots were probed for *ght3* and the *Loz1* target *zrt1*. Ribosomal RNAs are shown as the loading control. B. Wild-type and *loz1Δ* cells expressing a *ght3-lacZ* reporter were grown as above and  $\beta$ -Galactosidase activity measure by standard methods. Results show the average values for 3 independent repeats and error bars represent standard deviations.

```

S.pombe          MTVTPINPTNQPYKYVFFVIGPAGSGKTTMAKAVSEKLGFEYIEGDDLHPKANIEKMSQG
H.sapiens      -----MAAPGALLVMGVSGSGKSTVGALLASELGWKFYDADDYHPEENRRKMGKG
E.coli         -----MAGESFILMGVSGSGKTLIGSKVAALLSAKFIDGDDLHPAKNIDKMSQG
                   ::::* :*****: ..  ::  *.  ::  :.* **  *  **.*:*

S.pombe          HPLNDNDRWGWLHNCGGACAMELDKESIKGVVLTCSALKRSYRDILRSSLEHR-----
H.sapiens      IPLNDQDRIPWLCNLHDILLRD--VASGQRVVLACSALKKTYRDILTQGKDGVALKCEES
E.coli         IPLSDEDRLPWLERLNDASYSL--YKKNETGFIVCSSLKKHYRDILRKGSPHV-----
                   **.*:* **  .           . :  .:.*:*:*: ***** ..

S.pombe          -----PAILRFIYLAASRETLIKRTTSRKNHYMKADMVESQLAILEAPTADEKDVITI
H.sapiens      GKEAKQAEMQLLVVHLSGSFEVISGRLLKREGHFMPPELLQSQFETLEPPAAPEN-FIQI
E.coli         -----HFLWLDGDYETILARMQRRAGHFMPVALLKSQFEALERPOEDEQDIVRI
                   .: * .. *.: *  *  *:*  :::*:  ** *  *: .: *

S.pombe          SVENGKEQSEEECLDIVHKMVNENKQP-----
H.sapiens      SVDKNVSEIIATIMETL-KMK-----
E.coli         DINHDIANVTEQCRQAVLAIRQNRICAKEGSASDQRC
                   .:::  :           : :  :

```

**Figure S2.** Idn1 from *S. pombe* shares sequence homology with characterized gluconate kinases.

An alignment of Idn1 from *S. pombe* with IdnK from *Escherichia coli* and *Homo sapiens*. Alignments were performed using Clustal Omega (EMBL-EBI).

HsH6PD MLAEFPNWHPGMWNMLIVAMCLALLG---CLQAQELQGHVSIILLGATGDLAKKYLWQGL 57  
 LmG6PD -----VSEIKTLVTFFGGTGDLAKRKLKLYPSV 26  
 DmCG7140 -----MISMDPHNEEAYSIVVFGASGGLAKKVVFPAL 32  
 SpSPAC3C7.13C -----MVTFMVFGASGNLANKKTFFPAL 22  
 SpSPCC794.01C -----MLSIIIVFGASGDLATKMTFFPAL 22  
 HsG6PD -MAEQV-----ALSRTQVCGILREELFQGDADFHQSDTHIFIIMGASGDLAKKKIYPTI 52  
 SpZWF1 -----MSSANLSIKENGAMVVFASGDLKSKKKTFFPAL 32  
 ScZWF1 -----MSEGPVKFEKNTVISVFGASGDLAKKKTFFPAL 32  
 . . : \* . : \* \* : : : :

HsH6PD FQLYLDEAGRHSFSFHGAALTAPKQGOELMAKALESLSCPKDMAPSHCAEHKQDFLQLS 117  
 LmG6PD FNLYKKGYLQK-HFAIVGTARQALNDEFK-QLVRD--CIK---DFTDQAQAEAFIEHF 79  
 DmCG7140 WALFRENRLPQ-GTKIFTFTRSPLQTKTYR-LQILP--YMELDKHR--DPKKYNLFWTTV 86  
 SpSPAC3C7.13C FHLFKRNLVDRSSFYVLGYARSKIPIGEFR-ESIRE--SVK---PDTESKQVFQDFIDRV 76  
 SpSPCC794.01C FALYVRKI IPE-DFQIIGYARSKLSQEAAAN-KIVTA--HIPIDDTVGASQKALNTFVEHY 78  
 HsG6PD WWLFRDGLLPE-NTFIVGYARSRLTVADIR-KQSEP--FFK---ATPEEKLKLEDFFARN 105  
 SpZWF1 FSLFSEGRLPK-DIRIVGYARSKIEHEDFL-DRITQ--NIKIDEEDSQAKEKLEEFKRC 88  
 ScZWF1 FGLFREGYLDP-STKIFGYARSKLSMEEDL-KSRVL--PHLKKPHGEADDSKVEQFFKMV 88  
 : \* : . : : \* :

HsH6PD QYR--QLKTAEDYQALNKDIEAQLOHAGLREAGRIFYFSVPPFAYEDIARNINSSCRPGP 175  
 LmG6PD SYRAHDVTDAAASYAVLKEAIEEAADKF-DIDGNRIFYMSVAPRFFGTIAKYLKSEGLLAD 138  
 DmCG7140 HCVQGEYDKPENYVALTEAMVHQETKHNQVRANRI FYLALPPIVFDQVTLNVSRCSSST- 145  
 SpSPAC3C7.13C SYFSGQYDQSSSYVEFRKHLESVEKKADSSKALRIFYALPPSVYVTVSSHIIYENLYL-- 134  
 SpSPCC794.01C KYVPGTYDKPESFEMLSIIAEKE-TAPASECTRI FYLVLPPLHFAPVSELIKSKAHPN- 136  
 HsG6PD SYVAGQYDDAASYQRLNSHMNALHL---GSQANRLFYLALPPTVVEAVTKNIHESCMSQI 162  
 SpZWF1 SYRGSYDKPEDFEGFLNSHLCE--REGDRSTHNRIFYLALPPDVFSVATNLKKKCVPE- 145  
 ScZWF1 SYISGNYDTDEGFDELRTQIEKFEKSANVDVPHRLFYLALPPSVFLTVAKQIKSRVYAE- 147  
 : : : \* : \* : \* : : :

HsH6PD GAWLRVVLEKPFPGHDFHSAQQALATELGTFFQEEEMYRVDHLYLGGQAVAQILPFRDQNRKA 235  
 LmG6PD TGYNRLMIEKPFGTSYDTAAELQNDLENAFDDNQLFRIDHLYLGGKEMVQNI AALRFGNP-I 197  
 DmCG7140 TGWNRI IVEKPFARDDISYKAFQTSLNCNFRESQIYLM D HLLSRQVMQNFALRYSNH-L 204  
 SpSPAC3C7.13C PGKSRLVIEKPFGKNYQSAVKLKEEVHKHWKEEIIYRIDHYTAKDMVNNFFTLRFANSSS 194  
 SpSPCC794.01C GMVTRLIVEKPIGFYKADAILS DLSKHWSAKDTFKVDHFLGEDMIDGFTAIRFANS-M 195  
 HsG6PD RGWNRI IVEKPFGRDLQSSDRLSNHISLFRDQIYRIDHLYLGGKEMVQNLMLVLRFANR-I 221  
 SpZWF1 KGIARLVIEKPFVDLKSQAQELQSQLAPLDFEKEIYRIDHLYLGGKEMVQNLVHLRFNCN-V 204  
 ScZWF1 NGITRIVEKPFGHDLASARELQKNLGPLFKEEELYRIDHLYLGGKELVKNLLVLRFNQ-F 206  
 \* : : \* : . . : : : : : \* : : : : \* \*

HsH6PD LDGLWNRHHRVERVEI IMKETV-DAEGRTSFYEEYGVIRDVLQNHLLTEVLTAVAMELPHNV 294  
 LmG6PD FDAAWNKYDIKNVQVTLSEVL-GVEERAGYYDTAGALLDMIQNHMTMQIVGWLAMEKPESF 256  
 DmCG7140 WAETLNHRHVAAMMISIKCELPVSVNRADYFNQFGIIRD LMTNHMIQMLAMLAMDQPYAN 264  
 SpSPAC3C7.13C IDAVLNHRHSIQSVEIHMYYETG-GCEGRIGYYDANGVVRD VVQNHLLTQIFCIAAMNEPKSA 253  
 SpSPCC794.01C FEPIWNREHIESVRVDFREDF-GCEGRGGYFEGAGILRD VVQNHLLQLLTLLCIEPKSQ 254  
 HsG6PD FGPIWNRDNIACVILTFKEPF-GTEGRGGYFDEFGIIRDVMQNHLLQMLCLVAMEKPAST 280  
 SpZWF1 ISHLWDKNSISSVQITFKPEPI-GTEGRGGYFDSSTIVRDIVQNHLLVQILTLLTMEPTPTTF 263  
 ScZWF1 LNASWNRDNIQSVQISFKERF-GTEGRGGYFDSIGIIRDVMQNHLLQIMTLLTMERPVSF 265  
 : : : \* : : : \* : : : \* : : \* : : \* :

HsH6PD SSAEAVLRHKLQVFQALRGLQRGS----AVVGQYQSYSEOV---RRELQ--KPDSFHSLT 345  
 LmG6PD T-DKDIRAAKNAAFNALKIYDEAEVKNKYFVRAQYAGDSAD---FKPYLEELDVPADSKN 312  
 DmCG7140 T-ADDLRAERLKVLRQVLTNPNGD----VFLAQYRNNRRETDPKACGYTEHTYIPKDSFT 319  
 SpSPAC3C7.13C S-ASDVRAEKVNLLKATRPASLKE----SMLGQYTTSEDGK---IPGYLDLEGVPKDSKA 305  
 SpSPCC794.01C D-AEDI IKCKVDFLKS LHPVSKED----IVYGQYTKSANGK---VPGYRELDGVADDSEV 306  
 HsG6PD N-SDDVRDEKVKVLCISEVQANN----VVLGQYVGNPDGEGEATKGYLDDPTVPRGSTT 335  
 SpZWF1 S-ADDLRDEKVKVLRRLRGLDLKD----IVLGQYVKS KD GK---KPGYLDDETVPKGSRC 315  
 ScZWF1 D-PESIRDEKVKVLRKAVAPIDTDD----VLLGQYKSEDGS---KPAYVDDDTVDKDSKC 317  
 . : : : . . : : \* \*

|               |                                |                                                  |                     |     |
|---------------|--------------------------------|--------------------------------------------------|---------------------|-----|
| HsH6PD        | PTFAAVLVHIDNLRWEGVPPFILMSGKALD | RVGYARILFKNQACCVQSEKHWAAAQSQCL                   | 405                 |     |
| LmG6PD        | NTFIAGELQFDLPRWEGVPPFYVRSGR    | RLAAKQTRVDIVFKAGTFNF-GSE-----QEAQ                | 365                 |     |
| DmCG7140      | PTFALVVLHINNRRWTGVPPILRAGKALND | TKSEVRIQYKPVDCDTFHSD-----STDI                    | 373                 |     |
| SpSPAC3C7.13C | TTFAASTLHVDNDRWKGVPFVFSVSG     | KRMKKGEVYIKYFRLKDSGIFSDV-----KR                  | 357                 |     |
| SpSPCC794.01C | STFCALQLRSEAPRWKGIPIIISAGK     | GLDRDYFEARITFKRREGGMFTV-----DS                   | 358                 |     |
| HsG6PD        | ATFAAVVLYVENERWDGVPPILRCGKALN  | EKAEVRLQFHDVAGDIFHQO-----CK                      | 387                 |     |
| SpZWF1        | PTYSAIPCFIDTERWRGVPPFLKAGKAMD  | IGKVEIRVQFKAAANGLFKD-----AY                      | 366                 |     |
| ScZWF1        | VTFAAMTFNIENERWEGVPIIMMRAGKALN | ESKVEIRLQYKAVASGVFKD-----IP                      | 368                 |     |
|               | * :                            | : ** * : * : . . * * :                           | ::                  |     |
| HsH6PD        | PRQLVFHIGHGDLGSPAVLVSRLFRPSLP  | SSWKEMEGPPGLRRLFSGPLSDYYAYSPVRE                  | 465                 |     |
| LmG6PD        | EAVLSIIIDPKG----               | AIELKLNKSVEDA-----FNTRTIDLGWTVSDEDK---KNT        | 411                 |     |
| DmCG7140      | RNELVLRSEFTE----               | EVFMRMRLKROGED-----ICLRESEINLRVDDRGPKG----       | 418                 |     |
| SpSPAC3C7.13C | RRYLILHVQPEE----               | FVNLTCTINKPMTTD-----LQPIDAYASLNQYQFKDLMKEK       | 407                 |     |
| SpSPCC794.01C | SNVLVLRVYPKE----               | FIALKGHKIQPGFS-----RQIVPVTLDVKYPEAFPDTWI--       | 405                 |     |
| HsG6PD        | RNELVIRVOPNE----               | AVYTKMMTKKPGMF-----FNPEESELDLTYGNRYKNVKL--       | 434                 |     |
| SpZWF1        | HNELVIRVOPDE----               | AIYFKMNIKQPLS-----EAPLLTDLTLYSRRFKNMKL--         | 413                 |     |
| ScZWF1        | NNELVIRVOPDA----               | AVYLKFNKATPGLS-----NATQVTDLNLTYASRYQDFWI--       | 415                 |     |
|               | * :                            | :                                                |                     |     |
| HsH6PD        | RDHSAVLLSHIFHGRKNFFIT          | TENLLASWNFWTPLLLESLAH---KAPRLYPGGAENGRLL         | 522                 |     |
| LmG6PD        | PEPYERMIHDTMNGDGSNFADWNGV      | SAWKFDVAISAVYTA-DKAPLETYKSGSM-GPEA               | 469                 |     |
| DmCG7140      | LQGLPGYLLNVFQGDQTLFMRSD        | EQCEIWRIFSPVLATIDS-DRPRPLHYDFGSR-GPLL            | 476                 |     |
| SpSPAC3C7.13C | RDGYEILFEDAIRGDP               | TKFIYRDEVEYAWKIWDEILDSP-----KKPIYPAGSD-GPEG      | 461                 |     |
| SpSPCC794.01C | HKAYEVVIADAI                   | NGKHTHFISDDEVRTSWKIFDDVLDTT---GDLSPLPYAFGSHHGPDA | 462                 |     |
| HsG6PD        | PDAYERLILDVFCGSQMHFVRS         | DELREAWRIFTPLLHQIEL-EKPKPIPYIYGSR-GPTE           | 492                 |     |
| SpZWF1        | HEAYEALFLDAFAGDQSR             | FARIDELECAWSLVDPLLKYMEE-EKVPPEPYEYGS-DGPEC       | 471                 |     |
| ScZWF1        | PEAYEVLIRDALLGDHSNFVRD         | DELDISWGIFTPLLKHIERPDPGPTPEIYPYGSR-GPKG          | 474                 |     |
|               | .                              | : . : * * : * : * : :                            | * * : *             |     |
| HsH6PD        | DFEFSSGRLFFSQ-----             | QPEQLVPGPGPAPMPSPDFQVLR                          | AKYRESPLVSAWSEELISK | 577 |
| LmG6PD        | SDKLLAANGDAWVFKG-----          |                                                  | 485                 |     |
| DmCG7140      | AYRKAERAGVFFATDEWHQ            | SEETLEYTVK----NSKQLIGPHTALKPVRDPRSKR----         | 528                 |     |
| SpSPAC3C7.13C | LEAYMKRHLGHE-----              |                                                  | 473                 |     |
| SpSPCC794.01C | TLEFFKRNLEWD-----              |                                                  | 475                 |     |
| HsG6PD        | ADELMKRVGFGQYEGTYK             | VWVNPVKL-----                                    | 516                 |     |
| SpZWF1        | LYSFLKKFGYIYDSDPYDY            | PVMSVPSDH-----                                   | 500                 |     |
| ScZWF1        | LKEYMQKHKHYVMPEKHPY            | AWPVTKPEDTKD----N*-----                          | 505                 |     |
| HsH6PD        | LANDIEATAVRAVRRFGQFHLALS       | GGSSPVALFQQLATAHYGFPWAH                          | THLWLVDERCVPL       | 637 |
| LmG6PD        | -----                          |                                                  | 485                 |     |
| DmCG7140      | -----                          | SNSNP-----                                       | 533                 |     |
| SpSPAC3C7.13C | -----                          |                                                  | 473                 |     |
| SpSPCC794.01C | -----                          |                                                  | 475                 |     |
| HsG6PD        | -----                          |                                                  | 516                 |     |
| SpZWF1        | -----                          |                                                  | 500                 |     |
| ScZWF1        | -----                          |                                                  | 505                 |     |

**Figure S3.** SPCC794.01c shares sequence homology with characterized glucose 6-phosphate dehydrogenases.

An alignment of human hexose 6 phosphate dehydrogenase (HsH6PD), *Leuconostoc mesenteroides* glucose 6 phosphate dehydrogenase (LmG6PD), *Drosophila melanogaster* CG7140, *S. pombe* SPAC3C7.13c (SpSPAC3C7.13C), *S. pombe* SPCC794.01c (SpSPCC794.01C), human glucose 6 phosphate dehydrogenase (HsG6PD), *S. pombe* Zwfl (SpZWF1), and *S. cerevisiae* Zwfl (ScZWF1). The sequence of HsH6PD was truncated at amino acid 637. Residues that are predicted to coordinate

the 6-phosphate (of G6P) and glucose (of G6P) are highlighted in green and yellow, respectively. Predictions were based of the structure of human glucose 6-phosphate dehydrogenase (1).

**Figure S4. Deletion of *zwf1* or *zwf1 gcd1* increases the NADP<sup>+</sup>/NADPH ratio in exponentially growing cells.**

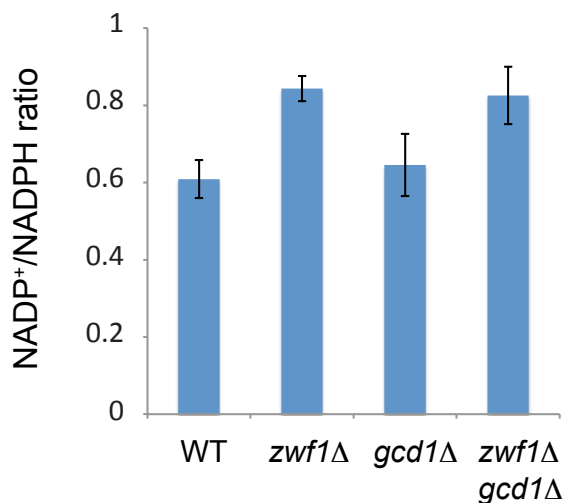

The indicated strains were grown to an A600 ~1.0 and the levels of NADP<sup>+</sup> and NADPH levels measured using the 3-(4,5-dimethylthiazolyl-2)-2,5-diphenyltetrazolium bromide and phenazine ethosulfate cycling assay. The data shown is the average NADP<sup>+</sup>/NADPH ratio from three independent experiments, with error bars representing the standard deviations.

## References

1. Kotaka M, Gover S, Vandeputte-Rutten L, Au SW, Lam VM, Adams MJ. Structural studies of glucose-6-phosphate and NADP<sup>+</sup> binding to human glucose-6-phosphate dehydrogenase. *Acta Crystallogr D Biol Crystallogr.* 2005;61(Pt 5):495-504.
